# Supplementary material for: Association between Precarious Employment and Chronic Stress: Effect of Gender, Stress Measurement and Precariousness Dimensions—A Cross-Sectional Study
Source: MDPI journal article supplement (doi:10.3390/ijerph19159099), 2022-07-26
Supplement: s1 [file s1]

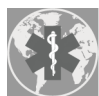

**Table S1.** Goodness-of-fit of EPRES scale from exploratory factor analysis. Precarious Employment and Stress Study sample, 2020, N men = 125, N women = 130.

|                                                                                                                                 | Factor 1 | Factor 2 | Factor 3 | Factor 4 | Factor 5 | Factor 6 | Factor 7 | Uniqueness |
|---------------------------------------------------------------------------------------------------------------------------------|----------|----------|----------|----------|----------|----------|----------|------------|
| Type of contract                                                                                                                |          |          | 0.26     | 0.62     | −0.16    |          | 0.23     | 0.47       |
| How long in total have you been working for this company?                                                                       |          |          | 0.30     | 0.34     | −0.15    |          |          | 0.75       |
| Approximately how much do you earn net per month?                                                                               | 0.21     |          | 0.66     | 0.11     | −0.16    |          |          | 0.49       |
| How often does your current salary allow you to cover your basic daily needs?                                                   | 0.10     |          | 0.73     |          |          |          |          | 0.43       |
| How often does your current salary allow you to cover major unforeseen expenses?                                                |          | 0.16     | 0.76     | 0.11     |          |          |          | 0.38       |
| How were the working conditions in relation to your working hours decided?                                                      |          | 0.11     |          |          |          | 0.69     |          | 0.51       |
| How were the working conditions in relation to your salary decided?                                                             |          |          |          |          |          | 0.67     |          | 0.54       |
| How often in this company are you afraid to demand better working conditions?                                                   | 0.20     | 0.48     |          |          |          |          |          | 0.72       |
| How often in this company do you feel defenceless against unfair treatment by your superiors?                                   | 0.24     | 0.67     |          |          |          | 0.12     |          | 0.47       |
| How often in this company would you be fired from your job if you did not do everything they asked you to do?                   |          | 0.34     | 0.15     |          |          |          | 0.28     | 0.77       |
| How often in this company are you treated in an authoritarian way?                                                              | 0.21     | 0.70     |          |          |          |          |          | 0.45       |
| How often in this company do they make you feel that you can easily be replaced?                                                | 0.11     | 0.69     | 0.18     |          |          |          |          | 0.48       |
| Entitlement to paternity/paternity leave                                                                                        | 0.10     |          | 0.22     | 0.48     |          |          | −0.28    | 0.62       |
| Entitlement to retirement pension, disability                                                                                   | 0.21     |          | 0.40     | 0.34     |          |          | −0.26    | 0.61       |
| Entitlement to unemployment benefit                                                                                             |          |          |          | 0.46     | 0.11     | 0.13     | 0.13     | 0.74       |
| Do you have the right to severance pay?                                                                                         |          |          |          | 0.61     |          |          | −0.13    | 0.61       |
| In this company you can take your weekly holidays without any problems                                                          | 0.20     |          |          |          |          | 0.19     | 0.22     | 0.86       |
| In this company, you can take your holidays without any problems                                                                | 0.31     | 0.15     | 0.15     | 0.14     |          |          | 0.35     | 0.71       |
| In this company you can take a day off for family reasons (care of children, dependants, sick people, etc.) without any problem | 0.61     | 0.36     |          | 0.19     |          |          | −0.10    | 0.44       |
| In this company you can take a day off for personal reasons without any problem                                                 | 0.68     | 0.31     |          |          |          |          | −0.13    | 0.41       |
| In this company you can take sick leave without any problem                                                                     | 0.63     |          | 0.18     | 0.15     |          | 0.11     | 0.19     | 0.49       |
| In this company, you can go to the doctor when you need to                                                                      | 0.71     | 0.12     | 0.11     |          |          |          |          | 0.46       |
| Voluntarily work overtime                                                                                                       |          | 0.10     |          |          | 0.75     |          |          | 0.41       |
| Number of overtime hours you work                                                                                               |          |          |          |          | 0.76     |          |          | 0.40       |

|                                                                                        |      |      |      |       |      |
|----------------------------------------------------------------------------------------|------|------|------|-------|------|
| Changes in working hours, If yes, how far in advance are you informed of such changes? | 0.15 | 0.14 | 0.23 | −0.18 | 0.86 |
|----------------------------------------------------------------------------------------|------|------|------|-------|------|

**Table S2.** Goodness-of-fit of EPRES scale from confirmatory factor analysis. Precarious Employment and Stress Study sample, 2020, N men = 125, N women = 130.

|                                  | $\chi^2$ [df]. <i>p</i> -Value  | CFI   | $\Delta$ CFI | TLI   | $\Delta$ TLI | RMSEA (90% CI)      | $\Delta$ RMSEA |
|----------------------------------|---------------------------------|-------|--------------|-------|--------------|---------------------|----------------|
| Regular CFA                      |                                 |       |              |       |              |                     |                |
|                                  | 322.909 [231]; <i>p</i> < 0.001 | 0.989 | -            | 0.987 | -            | 0.040 (0.030–0.050) | -              |
| Multi-group CFA by women and men |                                 |       |              |       |              |                     |                |
| Configural invariance            | 628.514 [462]; <i>p</i> < 0.001 | 0.982 | 0            | 0.979 | 0            | 0.054 (0.043–0.064) | 0.014          |
| Metric invariance                | 659.604 [479]; <i>p</i> < 0.001 | 0.981 | −0.001       | 0.978 | −0.001       | 0.055 (0.044–0.065) | 0.001          |
| Thresholds invariance            | 683.268 [541]; <i>p</i> < 0.001 | 0.985 | 0.004        | 0.985 | 0.007        | 0.046 (0.034–0.056) | −0.009         |

**Table S3.** Reliability of EPRES scale from Cronbach's alpha. Precarious Employment and Stress Study sample. 2020. N men = 125. N women = 130.

| Item                                                                                                          | Obs  | Sign | Item-Test Correlation | Item-Rest Correlation | Average Interitem Covariance | Alpha |
|---------------------------------------------------------------------------------------------------------------|------|------|-----------------------|-----------------------|------------------------------|-------|
| Salary                                                                                                        |      |      |                       |                       |                              |       |
| Approximately how much do you earn net per month?                                                             | 254  | +    | 0.76                  | 0.59                  | 1.16                         | 0.77  |
| How often does your current salary allow you to cover your basic daily needs?                                 | 254  | +    | 0.86                  | 0.67                  | 0.72                         | 0.65  |
| How often does your current salary allow you to cover major unforeseen expenses?                              | 254  | +    | 0.90                  | 0.70                  | 0.54                         | 0.66  |
| Test scale                                                                                                    |      |      |                       |                       | 0.80                         | 0.78  |
| Vulnerability                                                                                                 |      |      |                       |                       |                              |       |
| How often in this company are you afraid to demand better working conditions?                                 | 255  | +    | 0.67                  | 0.44                  | 0.74                         | 0.71  |
| How often in this company do you feel defenceless against unfair treatment by your superiors?                 | 255  | +    | 0.74                  | 0.57                  | 0.68                         | 0.66  |
| How often in this company would you be fired from your job if you did not do everything they asked you to do? | 255  | +    | 0.62                  | 0.33                  | 0.81                         | 0.76  |
| How often in this company are you treated in an authoritarian way?                                            | 255  | +    | 0.75                  | 0.61                  | 0.70                         | 0.65  |
| How often in this company do they make you feel that you can easily be replaced?                              | 255  | +    | 0.76                  | 0.59                  | 0.64                         | 0.65  |
| Test scale                                                                                                    |      |      |                       |                       | 0.71                         | 0.73  |
| Rights                                                                                                        |      |      |                       |                       |                              |       |
| Entitlement to paternity/paternity leave.                                                                     | 255+ |      | 0.71                  | 0.43                  | 0.07                         | 0.51  |
| Entitlement to retirement pension, disability                                                                 | 255+ |      | 0.67                  | 0.37                  | 0.08                         | 0.56  |
| Entitlement to unemployment benefit                                                                           | 255+ |      | 0.57                  | 0.29                  | 0.10                         | 0.61  |
| Do you have the right to severance pay?                                                                       | 255+ |      | 0.75                  | 0.48                  | 0.06                         | 0.46  |
| Test scale                                                                                                    |      |      |                       |                       | 0.08                         | 0.61  |
| Vulnerability                                                                                                 |      |      |                       |                       |                              |       |
| In this company you can take your weekly holidays without any problems                                        | 255  | +    | 0.44                  | 0.28                  | 0.67                         | 0.79  |

|                                                                                                                                 |     |   |      |      |      |      |
|---------------------------------------------------------------------------------------------------------------------------------|-----|---|------|------|------|------|
| In this company, you can take your holidays without any problems                                                                | 255 | + | 0.59 | 0.40 | 0.58 | 0.76 |
| In this company you can take a day off for family reasons (care of children, dependants, sick people, etc.) without any problem | 255 | + | 0.76 | 0.60 | 0.47 | 0.71 |
| In this company you can take a day off for personal reasons without any problem                                                 | 255 | + | 0.79 | 0.64 | 0.45 | 0.70 |
| In this company you can take sick leave without any problem                                                                     | 255 | + | 0.72 | 0.56 | 0.50 | 0.73 |
| In this company, you can go to the doctor when you need to                                                                      | 255 | + | 0.74 | 0.60 | 0.50 | 0.72 |
| Test scale                                                                                                                      |     |   |      |      | 0.53 | 0.77 |
| Salary                                                                                                                          |     |   |      |      |      |      |
| Voluntarily work overtime                                                                                                       | 253 | + | 0.77 | 0.46 | 0.19 | 0.19 |
| Number of overtime hours you work                                                                                               | 253 | + | 0.81 | 0.49 | 0.08 | 0.09 |
| Changes in working hours, If yes, how far in advance are you informed of such changes?                                          | 253 | + | 0.56 | 0.08 | 1.08 | 0.78 |
| Test scale                                                                                                                      |     |   |      |      | 0.45 | 0.51 |

**Table S4.** Linear regression coefficients and 95% confidence intervals (CI) for EPRES global scale predicting Production of Adrenal and Gonadal steroids, adjusted for age and stratified by sex. Precarious Employment and Stress Study sample, 2020.

| Outcomes <sup>1</sup>                 | Men (n = 125) |              | Women (n = 130) |              |
|---------------------------------------|---------------|--------------|-----------------|--------------|
|                                       | $\beta$       | 95%CI        | $\beta$         | 95%CI        |
| Adrenal and gonadal steroids          |               |              |                 |              |
| Cortisol                              | −0.01         | (−0.27–0.26) | −0.01           | (−0.23–0.22) |
| 20 $\alpha$ DHF                       | 0.10          | (−0.24–0.43) | 0.19            | (−0.08–0.46) |
| 20 $\beta$ DHF                        | 0.05          | (−0.14–0.25) | 0.13            | (−0.03–0.28) |
| 20 $\alpha$ DHE                       | 0.06          | (−0.14–0.25) | 0.24 *          | (0.06–0.43)  |
| 20 $\beta$ DHE                        | 0.05          | (−0.14–0.24) | 0.21 **         | (0.05–0.37)  |
| Cortisone                             | 0.04          | (−0.14–0.22) | 0.16            | (−0.01–0.33) |
| Cortolone                             | 0.02          | (−0.15–0.20) | 0.05            | (−0.12–0.21) |
| Dehydrocortisone                      | 0.11          | (−0.06–0.28) | 0.17 *          | (0.00–0.34)  |
| Testosterone                          | 0.14          | (−0.07–0.36) | 0.08            | (−0.28–0.44) |
| Androstenedione (AED)                 | 0.08          | (−0.09–0.25) | 0.15            | (−0.05–0.35) |
| Progesterone                          | 0.12          | (−0.54–0.78) | 0.05            | (−0.49–0.60) |
| 20 $\alpha$ DHF/20 $\beta$ DHF        | 0.03          | (−0.21–0.26) | 0.06            | (−0.11–0.23) |
| 20 $\alpha$ DHE/20 $\beta$ DHE        | 0.01          | (−0.07–0.08) | 0.03            | (−0.04–0.11) |
| Cotisone _Dehydrocorticosterone (E_A) | −0.07         | (−0.24–0.11) | −0.01           | (−0.22–0.19) |
| Cortisol_Cortisone                    | −0.04         | (−0.24–0.16) | −0.16 *         | (−0.32–0.00) |
| %Cortisol                             | −0.04         | (−0.18–0.10) | −0.16 **        | (−0.27–0.05) |
| %Cortisone                            | 0.00          | (−0.08–0.08) | 0.00            | (−0.06–0.07) |
| %20 $\alpha$ DHF                      | 0.06          | (−0.17–0.30) | 0.04            | (−0.14–0.21) |
| %20 $\beta$ DHF                       | 0.02          | (−0.08–0.12) | −0.02           | (−0.11–0.06) |
| %20 $\alpha$ DHE                      | 0.02          | (−0.07–0.11) | 0.09 *          | (0.00–0.17)  |
| %20 $\beta$ DHE                       | 0.02          | (−0.07–0.10) | 0.06            | (−0.01–0.12) |
| 20 $\alpha$ DHF/Cortisol              | 0.10          | (−0.15–0.36) | 0.20 *          | (0.01–0.38)  |
| 20 $\beta$ DHF/Cortisol               | 0.06          | (−0.13–0.25) | 0.14            | (−0.01–0.28) |

<sup>1</sup> All outcomes have been transformed into logarithms to correct skewness. \*\*  $p < 0.01$ , \*  $p < 0.05$ .
